# Supplementary material
Source: MDPI journal article supplement (https://www.mdpi.com/2227-9040/9/12/344)
Supplement: s1 [file s1]

Archive with 1 entries (1 files):
- chemosensors-1424209-Supplementary.pdf
