# Supplementary material
Source: MDPI journal article supplement (https://www.mdpi.com/2227-9040/9/12/344)
Supplement: s1 [file s1 › chemosensors-1424209-Supplementary.pdf]

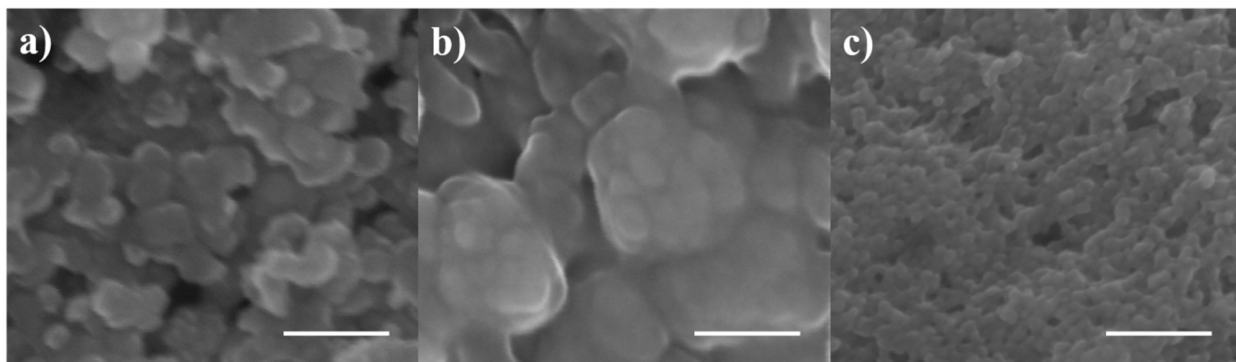

**Figure S1.** SEM images of (a) bare carbon screen-printed electrode (SPE), (b) Prussian Blue film on SPE, (c) PB-NiHCF nanoparticles on SPE. The scalebar is 100 nm.

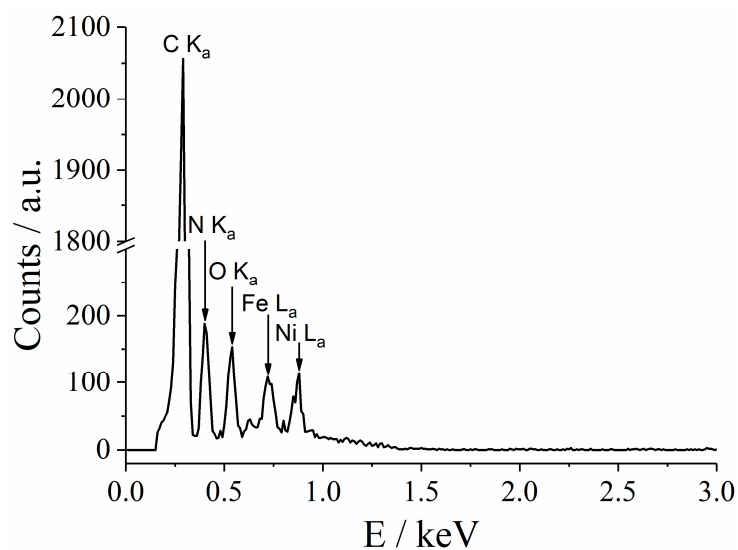

**Figure S2.** Energy dispersive X-ray (EDX) spectra of a PB-NiHCF nanoparticles modified carbon screen-printed electrode.

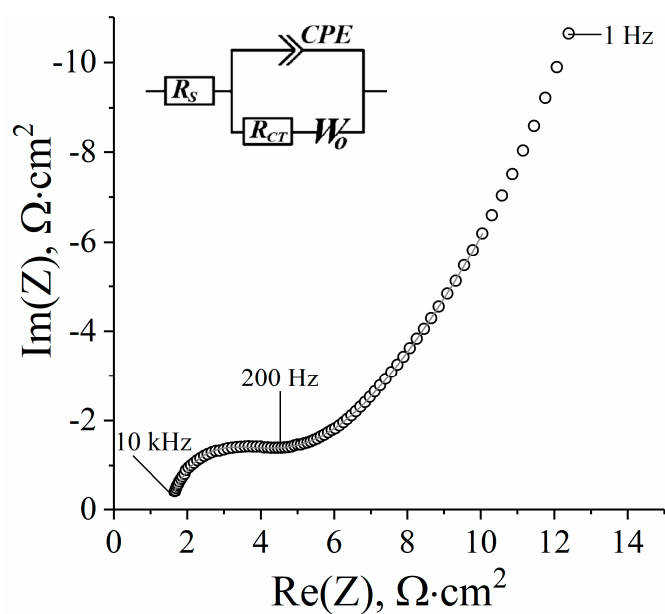

**Figure S3.** Impedance spectra in Nyquist's plots of PB-NiHCF nanoparticles modified electrodes; 0.1 M KCl in 0.1 M HCl,  $\Delta E = 5$  mV,  $E_{DC} = 120$  mV vs. Ag|AgCl (Prussian Blue|Prussian White redox potential). Solid lines represent fitting to the equivalent circuit shown in the inset.

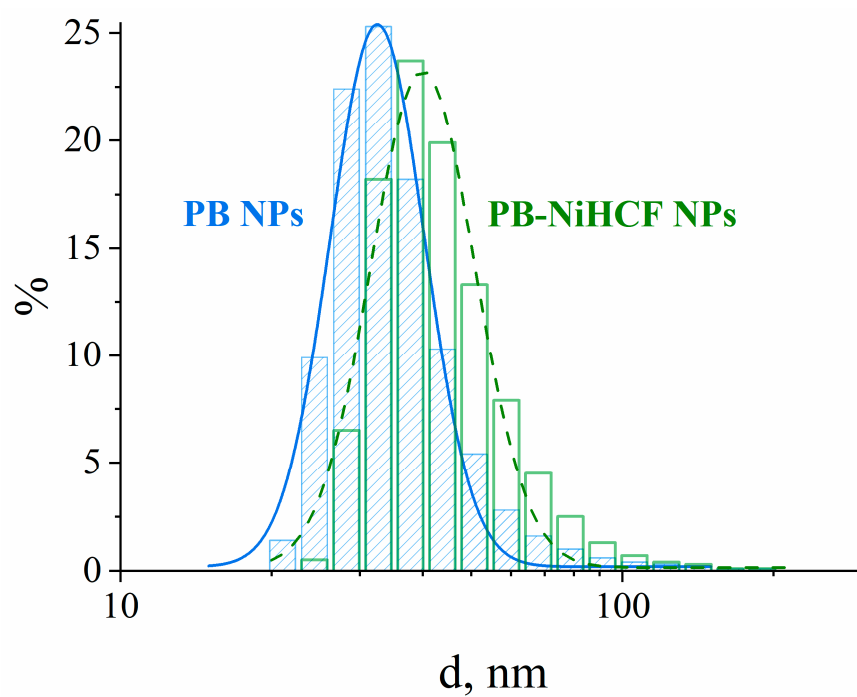

**Figure S4.** Dynamic light scattering fit to the log-normal distribution for Prussian Blue (—) and PB-NiHCF (---) nanoparticles.

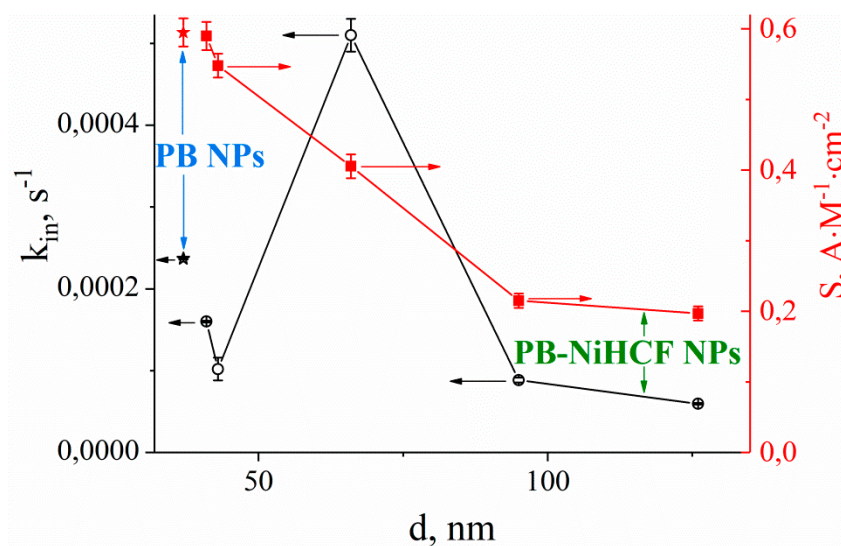

**Figure S5.** Sensitivities ( $\blacksquare, \star$ ) and inactivation constants ( $\circ, \star$ ) for sensors based on PB-NiHCF nanoparticles and Prussian Blue nanoparticles, respectively (0.5 mM  $\text{H}_2\text{O}_2$ , 0.1 M KCl, 0.05 M  $\text{KH}_2\text{PO}_4/\text{K}_2\text{HPO}_4$ , pH 6.0, 0.0 V vs. Ag|AgCl).

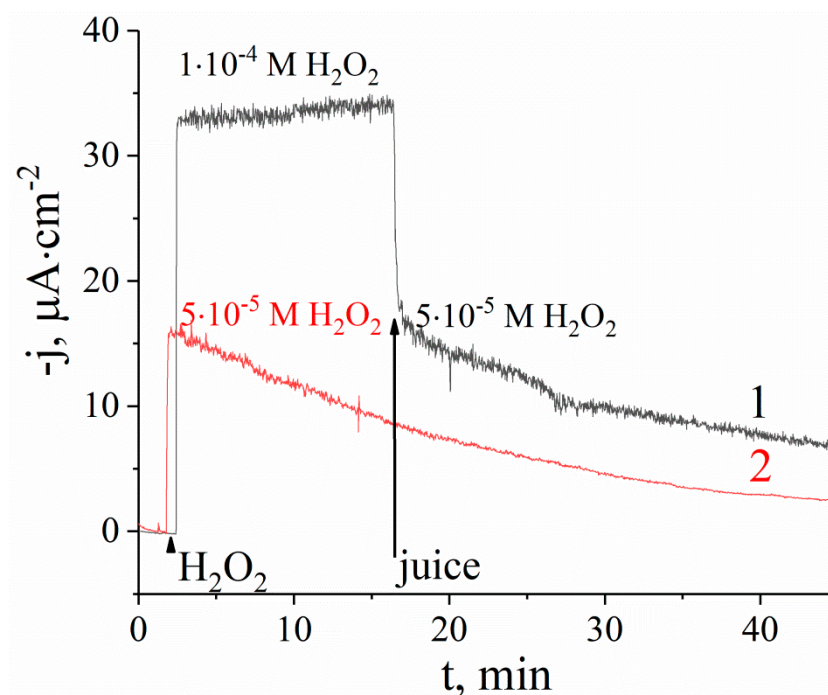

**Figure S6.** Amperometric signal of hydrogen peroxide sensor after  $\text{H}_2\text{O}_2$  injection in phosphate buffer solution with consequent addition of fresh grapefruit juice (1) and after  $\text{H}_2\text{O}_2$  injection in fresh grapefruit juice (2) (0.1 M KCl, 0.05 M  $\text{KH}_2\text{PO}_4/\text{K}_2\text{HPO}_4$ , pH 6.0, 0.0 V vs. Ag|AgCl).

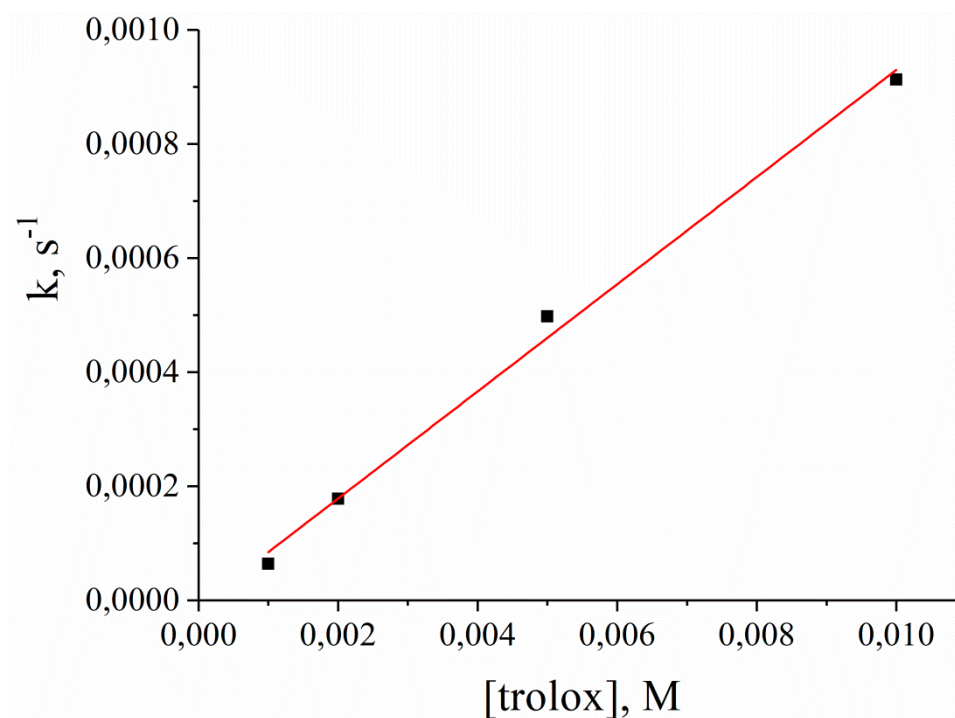

**Figure S7.** Dependence of antioxidant activity on trolox concentration (0.1 M KCl, 0.05 M  $\text{KH}_2\text{PO}_4/\text{K}_2\text{HPO}_4$ , pH 6.0, 0.0 V vs. Ag|AgCl).
